# Supplementary material
Source: publisher figshare collection journal article supplement (https://sage.figshare.com/ndownloader/files/13899692)
Supplement: Supplementary file 1 [file 13899692]

JTE-15-07-0004.R3

## Rethinking Student Teacher Feedback: Using a self-assessment resource with student teachers

**Abstract:** This study examines 10 pre-service teachers' use of Freiberg's Person-Centered Learning Assessment (PCLA), a self-assessment measure. The PCLA serves as an individualized resource for educators to assess their classroom teaching and learning particularly in the affective domain. Study findings indicate that the 10 student teachers identified future pedagogical changes as a result of utilizing the PCLA, with eight student teachers specifically identifying changes in their classrooms prior to completion of the study. As explored in this study, self-assessments seem to provide novice educators with a unique form of feedback and have the potential to lead to deeper levels of pedagogical self-reflection and resulting changes.

教师教学反思之再思考：教师自我评估源的使用

**内容摘要：**本文探究十位前教师使用人本学习评估（PCLA）的使用。该评估由Freiberg构建，是一种自我评估量方式。教育者常用它来评估课堂教学和学

习，尤其是在态度范畴。研究发现，十位教师在使用人本学习评估(PCLA)后识别了他将来需要实行的教学改变。其中八位教师在使用人本学习评估(PCLA)之前就已找到了课堂中需要改变的地方。正如本文所探索的，自我评估为新老教师提供了一种特殊的教学反思。同时，自我评估具有引导教师进行深层次自我反思和教学改变的潜力
